# Supplementary material for: Exfoliating nanomaterials in canola protein derived adhesive improves strength and water resistance
Source: Royal Society of Chemistry journal article supplement (doi:10.1039/c6ra27470f), 2017-01-01
Supplement: c6ra27470f1.pdf [file c6ra27470f1.pdf]

***Electronic Supplementary Information***

Exfoliating Nanomaterials in Canola Protein Derived Adhesive  
Improves Strength and Water Resistance

***Nandika Bandara, Yussef Esparza, Jianping Wu\****,

Department of Agricultural, Food and Nutritional Science, University of Alberta, Edmonton,  
Canada

\*Corresponding author:

Tel: (1-780)492-6885 Fax: (1-780)492-4265

E-mail: [jwu3@ualberta.ca](mailto:jwu3@ualberta.ca)

Figure S1 - Elemental composition and C:O ratio of prepared graphite oxide

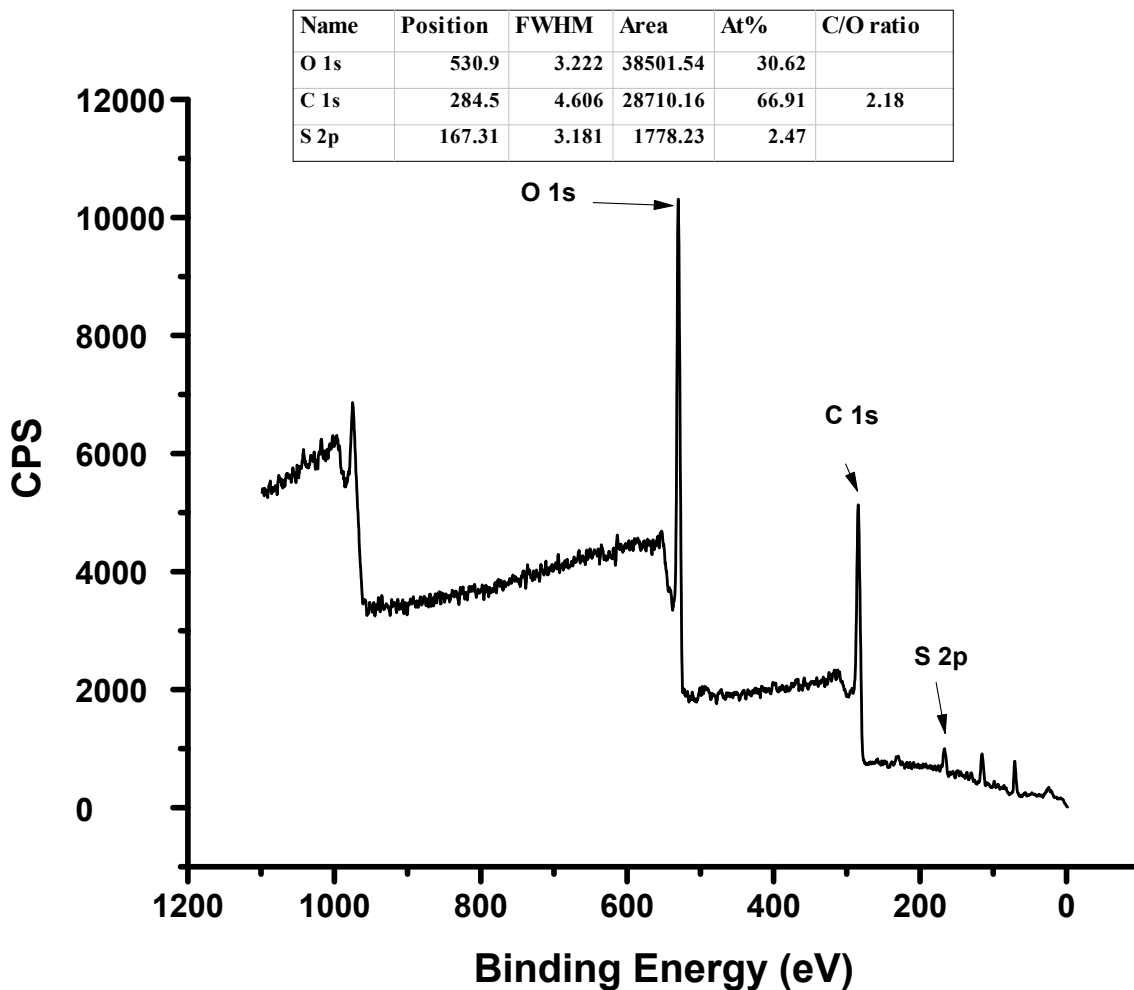

Figure S1 – X-ray photoelectron spectra showing elemental composition and C/O ratio in graphite oxide used for the study

**Table S1 - Adhesion strength of SM-MMT and NCC dispersed Canola protein adhesive (SM-MMT/NCC addition was carried out according the protocol of Zhang et al (2014) to compare the method develop in our lab)**

| <b>Sample</b>      | <b>Method developed by Zhang et al (2014)</b> |                           | <b>Method developed in our lab</b> |                           |
|--------------------|-----------------------------------------------|---------------------------|------------------------------------|---------------------------|
|                    | <i>Dry Strength (MPa)</i>                     | <i>Wet Strength (MPa)</i> | <i>Dry Strength (MPa)</i>          | <i>Wet Strength (MPa)</i> |
| <b>(-) Control</b> | 3.41 ± 0.38                                   | 1.23 ± 0.07               | 3.41 ± 0.38                        | 1.23 ± 0.07               |
| <b>pH Control</b>  | 6.38 ± 0.84                                   | 1.98 ± 0.22               | 6.38 ± 0.84                        | 1.98 ± 0.22               |
| <b>1% SM-MMT</b>   | 6.20 ± 0.53                                   | 1.81 ± 0.53               | 9.29 ± 1.53                        | 3.19 ± 0.57               |
| <b>3% SM-MMT</b>   | 5.76 ± 0.34                                   | 1.57 ± 0.14               | 7.51 ± 1.11                        | 2.81 ± 0.38               |
| <b>5% SM-MMT</b>   | 5.16 ± 0.62                                   | 1.43 ± 0.18               | 6.71 ± 1.04                        | 2.35 ± 0.47               |
| <b>7% SM-MMT</b>   | 3.94 ± 0.49                                   | 1.36 ± 0.22               | 4.85 ± 0.64                        | 1.85 ± 0.43               |
| <b>1% NCC</b>      | 6.57 ± 0.38                                   | 1.95 ± 0.14               | 10.37 ± 1.63                       | 3.57 ± 0.57               |
| <b>3% NCC</b>      | 6.26 ± 0.27                                   | 1.78 ± 0.10               | 9.86 ± 1.87                        | 3.03 ± 0.42               |
| <b>5% NCC</b>      | 5.90 ± 0.21                                   | 1.63 ± 0.08               | 9.58 ± 1.14                        | 2.99 ± 0.68               |
| <b>7% NCC</b>      | 5.78 ± 0.35                                   | 1.61 ± 0.14               | 8.46 ± 1.31                        | 2.84 ± 0.53               |

# Nanomaterial induced protein secondary structural changes

## Figure S2: Effect of bentonite concentration on protein secondary structure

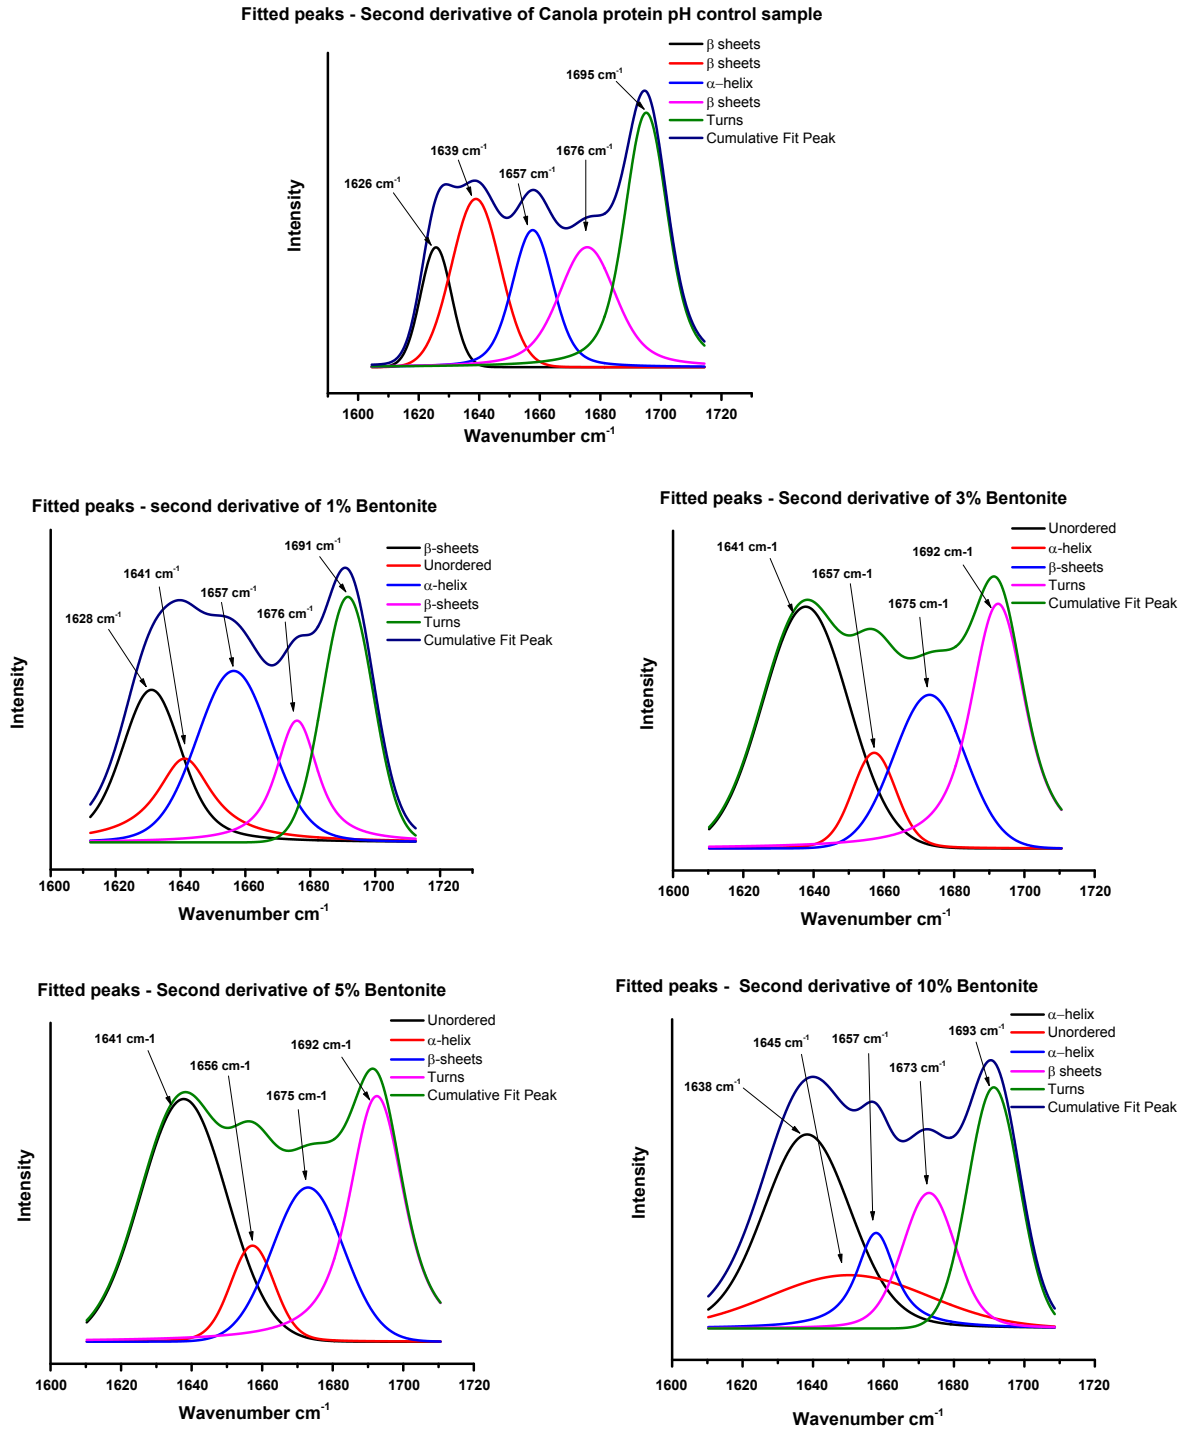

Figure S2 – Peak fitting of FTIR second derivative spectra showing bentonite induced changes in protein secondary structure

**Figure S3: Effect of SM-MMT concentration on protein secondary structure**

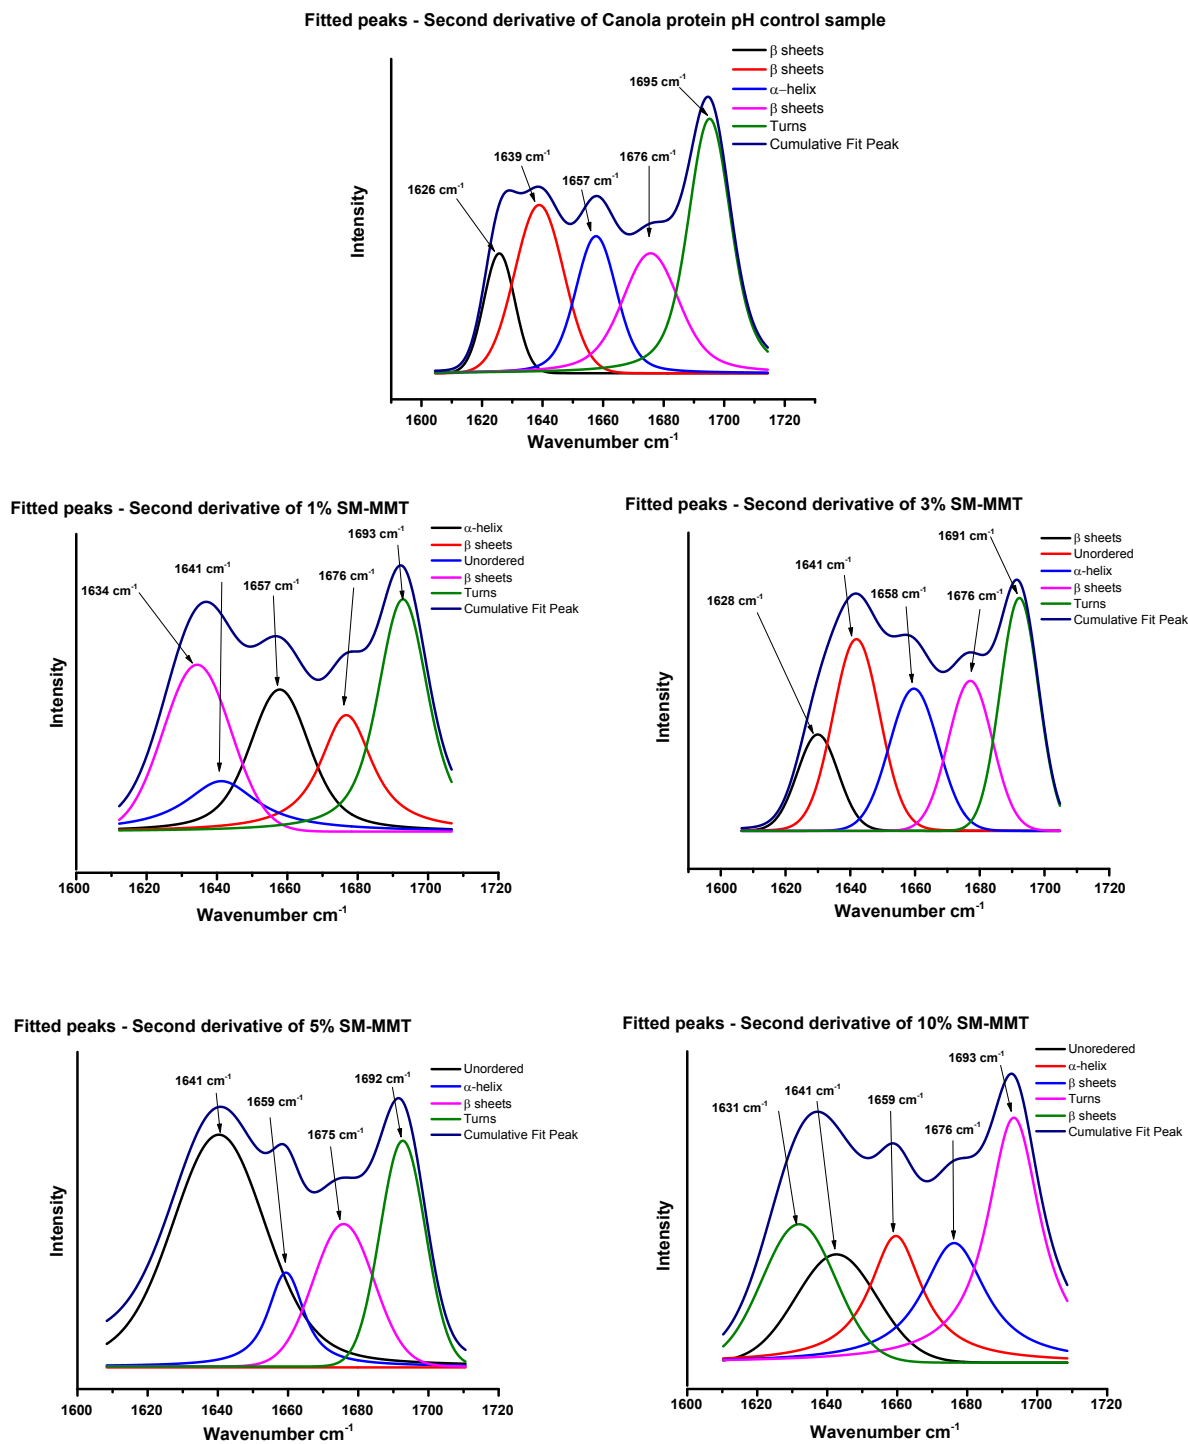

*Figure S3 – Peak fitting of FTIR second derivative spectra showing SM-MMT induced changes in protein secondary structure*

**Figure S4: Effect of NCC concentration on protein secondary structure**

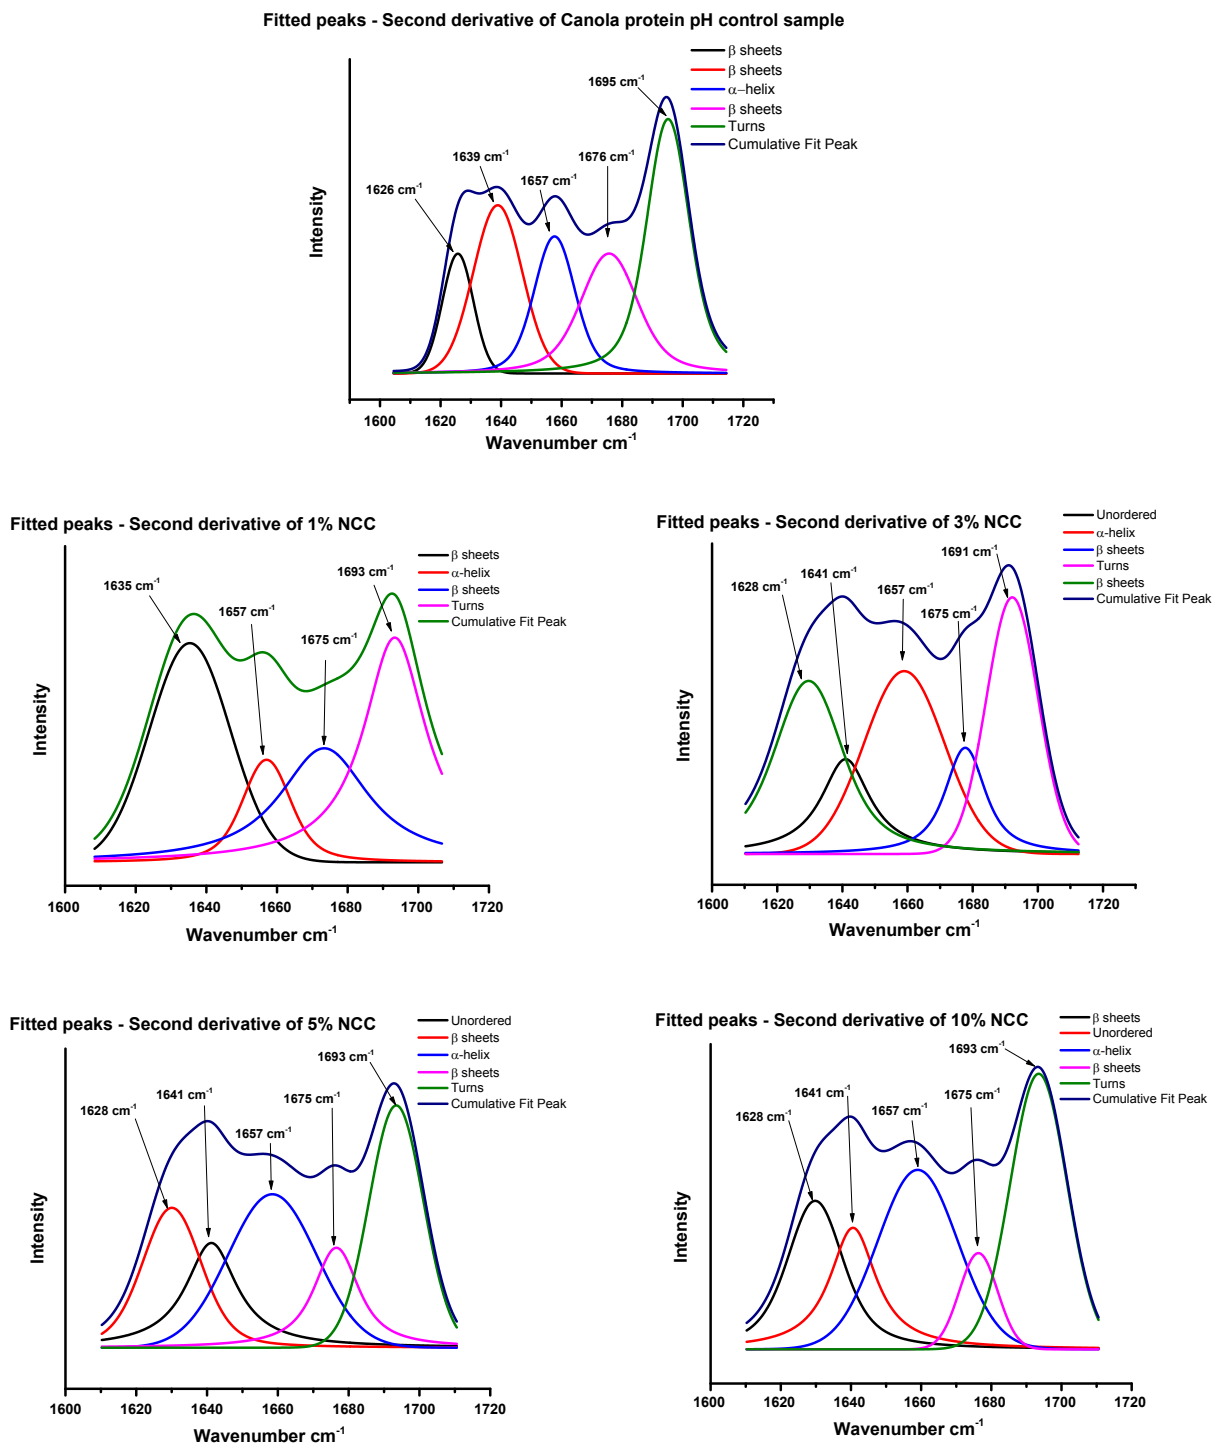

*Figure S4 – Peak fitting of FTIR second derivative spectra showing NCC induced changes in protein secondary structure*

**Figure S5: Effect of GO concentration on protein secondary structure**

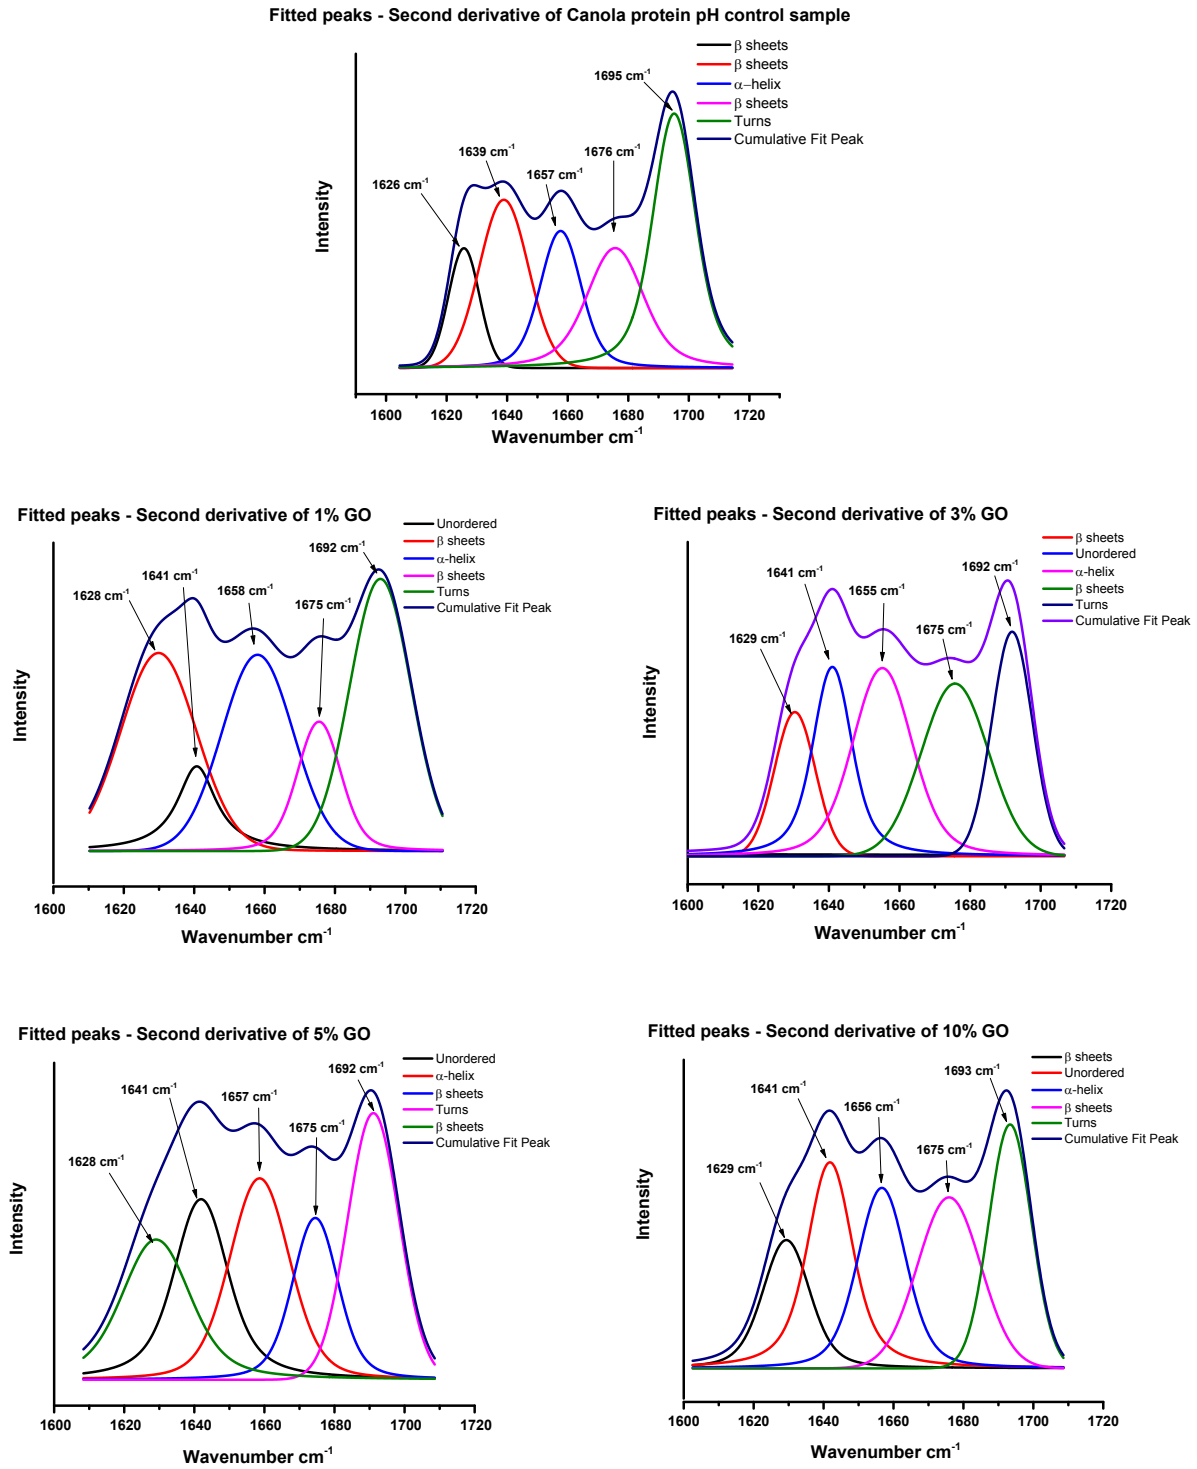

*Figure S5 – Peak fitting of FTIR second derivative spectra showing GO induced changes in protein secondary structure*
